# Supplementary material for: Type-dependent differences in Fas expression and phagocytes distribution in rat corpora lutea during natural regression: an immunohistochemical evidence
Source: PubMed Central journal article supplement — J Vet Med Sci. 2016 Aug 19;78(12):1771–7. doi: 10.1292/jvms.16-0199 (PMC5240753; doi:10.1292/jvms.16-0199), 2016-08-19
Supplement: jvms-78-1771-s001.pdf [file jvms-78-1771-s001.pdf]

# Satoh et al. Supplementary Fig. 1

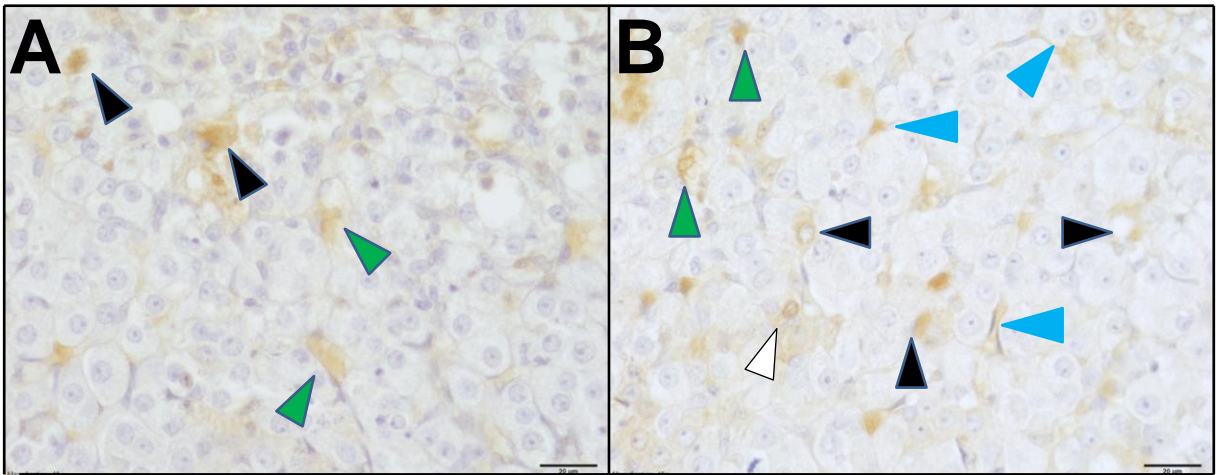

# Satoh et al. Supplementary Fig. 2

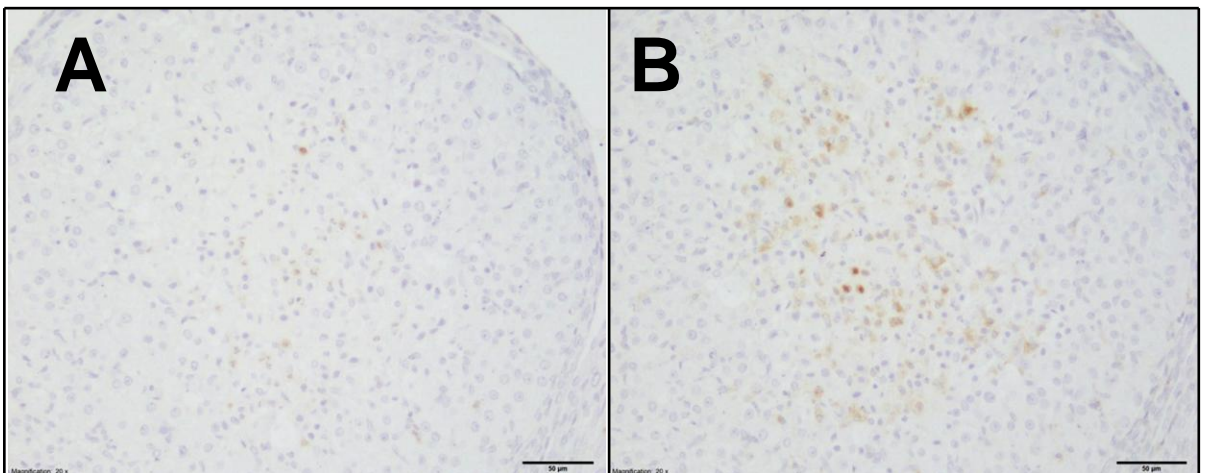

# Satoh et al. Supplementary Fig. 3

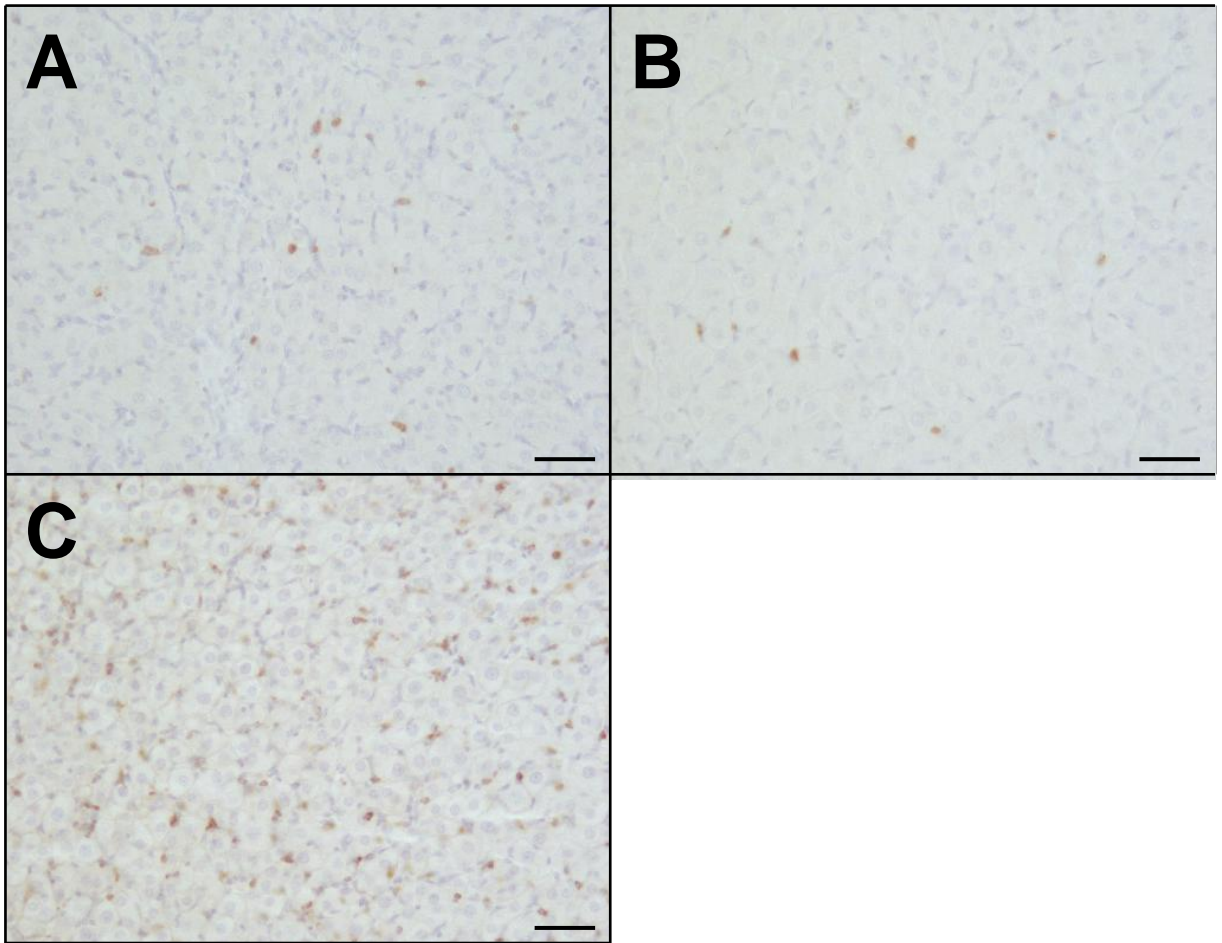

Supplementary Table 1. Antibodies and a blocking peptide of Fas

| antibody or antigen    | Company                  | Location               | Cat. Number | Dilution at use |
|------------------------|--------------------------|------------------------|-------------|-----------------|
| anti-mouse Fas         | Wako Chemical            | Osaka, Japan           | 013-16461   | 1: 500          |
| Fas blocking peptide   | BioVision                | Mountain View, CA, USA | 3070RBP-50  | 0.5 mg/ml       |
| anti-rat CD68          | AbD Serotec              | Oxford, UK             | MCA341GA    | 1: 200          |
| anti-human MPO         | Thermo Scientific        | Fremont, CA, USA       | RB-373-A1   | 1: 200          |
| anti-rat FasL          | Santa Cruz Biotechnology | Santa Cruz, CA, USA    | sc-6237     | 1: 200          |
| anti-cleaved caspase 3 | Trevigen                 | Gaithersburg, MD, USA  | 2305-PC-020 | 1: 200          |
| normal mouse IgG       | Serotec                  | Oxford, UK             | MCA1209     | 1: 200          |
